# Supplementary material for: Use of cytokine-induced killer cell therapy in patients with colorectal cancer: a systematic review and meta-analysis
Source: HighWire-hosted journal article supplement (doi:10.1136/jitc-2023-006764), 2023-04-01
Supplement: jitc-2023-006764supp001_data_supplement.pdf [file jitc-2023-006764supp001_data_supplement.pdf]

## Supplementary Data

### Supplementary Tables

#### Supplementary Table 1. Search strategy for Embase

|     |                                                                                                                                                                                                                                                                                                                       |
|-----|-----------------------------------------------------------------------------------------------------------------------------------------------------------------------------------------------------------------------------------------------------------------------------------------------------------------------|
| #1  | Cytokine-Induced Killer Cells/                                                                                                                                                                                                                                                                                        |
| #2  | cytokine induced killer cell*.mp. [mp=title, abstract, original title, name of substance word, subject heading word, floating sub-heading word, keyword heading word, organism supplementary concept word, protocol supplementary concept word, rare disease supplementary concept word, unique identifier, synonyms] |
| #3  | (cytokine induced adj6 killer cell*).mp. [mp=title, abstract, heading word, drug trade name, original title, device manufacturer, drug manufacturer, device trade name, keyword heading word, floating subheading word, candidate term word]                                                                          |
| #4  | 2 or 3                                                                                                                                                                                                                                                                                                                |
| #5  | 1 or 4                                                                                                                                                                                                                                                                                                                |
| #6  | *colorectal cancer*/ or colorectal neoplasm*.mp. or colon cancer*.mp. [mp=title, abstract, heading word, drug trade name, original title, device manufacturer, drug manufacturer, device trade name, keyword heading word, floating subheading word, candidate term word]                                             |
| #7  | exp colon tumor/                                                                                                                                                                                                                                                                                                      |
| #8  | exp rectum tumor/                                                                                                                                                                                                                                                                                                     |
| #9  | 6 or 7 or 8                                                                                                                                                                                                                                                                                                           |
| #10 | 5 or 9                                                                                                                                                                                                                                                                                                                |

**Supplementary Table 2. Search strategy for MEDLINE**

|    |                                                                                                                                                                                                                                                                                                                                                           |
|----|-----------------------------------------------------------------------------------------------------------------------------------------------------------------------------------------------------------------------------------------------------------------------------------------------------------------------------------------------------------|
| #1 | Cytokine-Induced Killer Cells/                                                                                                                                                                                                                                                                                                                            |
| #2 | cytokine induced killer cell*.mp. [mp=title, abstract, original title, name of substance word, subject heading word, floating sub-heading word, keyword heading word, organism supplementary concept word, protocol                                                                                                                                       |
| #3 | (cytokine induced adj6 killer cell*).mp. [mp=title, abstract, original title, name of substance word, subject heading word, floating sub-heading word, keyword heading word, organism supplementary concept word, protocol supplementary concept word, rare disease supplementary concept word, unique identifier, synonyms]                              |
| #4 | 2 or 3                                                                                                                                                                                                                                                                                                                                                    |
| #5 | 1 or 4                                                                                                                                                                                                                                                                                                                                                    |
| #6 | exp Colorectal Neoplasms/                                                                                                                                                                                                                                                                                                                                 |
| #7 | *colorectal cancer*/ or colorectal neoplasm*.mp. or colon cancer*.mp. [mp=title, abstract, original title, name of substance word, subject heading word, floating sub-heading word, keyword heading word, organism supplementary concept word, protocol supplementary concept word, rare disease supplementary concept word, unique identifier, synonyms] |
| #8 | 6 or 7                                                                                                                                                                                                                                                                                                                                                    |
| #9 | 5 and 8                                                                                                                                                                                                                                                                                                                                                   |

### Supplementary Figures

|            | Random sequence generation (selection bias) | Allocation concealment (selection bias) | Blinding of participants and personnel (performance bias) | Blinding of outcome assessment (detection bias) | Imbalance in baseline characteristics (selection bias) | Uniformity of control treatment (performance bias) | Incomplete outcome data (attrition bias) |
|------------|---------------------------------------------|-----------------------------------------|-----------------------------------------------------------|-------------------------------------------------|--------------------------------------------------------|----------------------------------------------------|------------------------------------------|
| Bian 2013  | ?                                           | ?                                       | +                                                         | +                                               | +                                                      | +                                                  | +                                        |
| Cai 2010   | ?                                           | ?                                       | +                                                         | +                                               | +                                                      | +                                                  | ?                                        |
| Cai 2013   | +                                           | +                                       | +                                                         | +                                               | +                                                      | +                                                  | +                                        |
| Cai 2017   | ?                                           | ?                                       | +                                                         | +                                               | +                                                      | +                                                  | ?                                        |
| Chao 2016  | +                                           | +                                       | +                                                         | +                                               | +                                                      | ?                                                  | +                                        |
| Chen 2014a | ?                                           | ?                                       | +                                                         | +                                               | +                                                      | ?                                                  | +                                        |
| Chen 2014b | +                                           | ?                                       | +                                                         | +                                               | +                                                      | +                                                  | +                                        |
| Chu 2016   | ?                                           | ?                                       | +                                                         | +                                               | +                                                      | +                                                  | +                                        |
| Deng 2018  | ?                                           | ?                                       | +                                                         | +                                               | +                                                      | +                                                  | +                                        |
| Dong 2018  | +                                           | +                                       | +                                                         | +                                               | +                                                      | ?                                                  | +                                        |
| Du 2013    | ?                                           | ?                                       | +                                                         | +                                               | +                                                      | +                                                  | ?                                        |
| Fan 2013   | ?                                           | ?                                       | +                                                         | +                                               | +                                                      | +                                                  | +                                        |
| Fang 2016  | ?                                           | ?                                       | +                                                         | +                                               | +                                                      | +                                                  | +                                        |
| Feng 2014  | +                                           | +                                       | +                                                         | +                                               | ?                                                      | +                                                  | +                                        |
| Feng 2017  | ?                                           | ?                                       | +                                                         | +                                               | +                                                      | ?                                                  | +                                        |
| Gao 2014   | ?                                           | ?                                       | +                                                         | +                                               | ?                                                      | ?                                                  | +                                        |
| Guo 2019   | ?                                           | ?                                       | +                                                         | +                                               | +                                                      | ?                                                  | +                                        |
| He 2018    | +                                           | +                                       | +                                                         | +                                               | +                                                      | +                                                  | +                                        |
| Jiang 2016 | ?                                           | ?                                       | +                                                         | +                                               | +                                                      | ?                                                  | +                                        |
| Leng 2016  | +                                           | +                                       | +                                                         | +                                               | +                                                      | +                                                  | +                                        |
| Li 2012    | ?                                           | ?                                       | +                                                         | +                                               | +                                                      | +                                                  | +                                        |
| Li 2015    | +                                           | +                                       | +                                                         | +                                               | +                                                      | ?                                                  | +                                        |
| Li 2016    | +                                           | +                                       | +                                                         | +                                               | +                                                      | +                                                  | ?                                        |
| Li 2022    | +                                           | +                                       | +                                                         | +                                               | +                                                      | +                                                  | +                                        |
| Lin 2016   | ?                                           | ?                                       | +                                                         | +                                               | +                                                      | ?                                                  | ?                                        |
| Liu 2014a  | ?                                           | ?                                       | +                                                         | +                                               | +                                                      | +                                                  | +                                        |
| Liu 2014b  | ?                                           | ?                                       | +                                                         | +                                               | ?                                                      | +                                                  | +                                        |
| Liu 2016a  | ?                                           | ?                                       | +                                                         | +                                               | +                                                      | ?                                                  | +                                        |
| Liu 2016b  | ?                                           | ?                                       | +                                                         | +                                               | +                                                      | +                                                  | +                                        |
| Liu 2016c  | +                                           | +                                       | +                                                         | +                                               | +                                                      | +                                                  | +                                        |
| Liu 2019   | +                                           | ?                                       | +                                                         | +                                               | +                                                      | +                                                  | +                                        |
| Liu 2020   | +                                           | ?                                       | +                                                         | +                                               | +                                                      | +                                                  | +                                        |
| Lv 2014    | ?                                           | ?                                       | +                                                         | +                                               | +                                                      | +                                                  | +                                        |
| Ma 2019    | ?                                           | ?                                       | +                                                         | +                                               | +                                                      | +                                                  | +                                        |
| Niu 2016   | ?                                           | ?                                       | +                                                         | +                                               | +                                                      | +                                                  | +                                        |
| Pan 2020a  | +                                           | +                                       | +                                                         | +                                               | +                                                      | ?                                                  | ?                                        |
| Pan 2020b  | +                                           | +                                       | +                                                         | +                                               | ?                                                      | +                                                  | ?                                        |
| Peng 2017  | +                                           | ?                                       | +                                                         | +                                               | +                                                      | +                                                  | ?                                        |
| Pu 2021    | +                                           | ?                                       | +                                                         | +                                               | +                                                      | +                                                  | ?                                        |
| Rui 2012   | ?                                           | ?                                       | +                                                         | +                                               | +                                                      | +                                                  | +                                        |
| Sun 2020   | ?                                           | ?                                       | +                                                         | +                                               | +                                                      | +                                                  | +                                        |
| Wang 2014  | ?                                           | ?                                       | ?                                                         | +                                               | +                                                      | +                                                  | +                                        |
| Wang 2016  | +                                           | ?                                       | +                                                         | +                                               | +                                                      | +                                                  | +                                        |
| Wang 2017  | ?                                           | ?                                       | +                                                         | +                                               | +                                                      | +                                                  | +                                        |
| Wang 2019  | +                                           | +                                       | +                                                         | +                                               | ?                                                      | ?                                                  | ?                                        |
| Weng 2013  | ?                                           | ?                                       | +                                                         | +                                               | +                                                      | +                                                  | +                                        |
| Weng 2014  | ?                                           | ?                                       | +                                                         | +                                               | +                                                      | +                                                  | +                                        |
| Wu 2018    | +                                           | +                                       | +                                                         | +                                               | +                                                      | ?                                                  | +                                        |
| Xie 2017   | +                                           | +                                       | +                                                         | +                                               | +                                                      | +                                                  | ?                                        |
| Xu 2021    | +                                           | +                                       | +                                                         | +                                               | +                                                      | ?                                                  | +                                        |
| Yan 2014   | +                                           | +                                       | +                                                         | +                                               | +                                                      | +                                                  | +                                        |
| Yin 2013   | +                                           | +                                       | +                                                         | +                                               | +                                                      | +                                                  | +                                        |
| Ying 2010  | +                                           | +                                       | +                                                         | +                                               | +                                                      | ?                                                  | ?                                        |
| Yuan 2016  | +                                           | ?                                       | +                                                         | +                                               | +                                                      | ?                                                  | +                                        |
| Yue 2016   | ?                                           | ?                                       | +                                                         | +                                               | +                                                      | ?                                                  | +                                        |
| Zang 2019  | ?                                           | ?                                       | +                                                         | +                                               | +                                                      | +                                                  | +                                        |
| Zhang 2011 | ?                                           | ?                                       | +                                                         | +                                               | +                                                      | ?                                                  | ?                                        |
| Zhang 2014 | ?                                           | ?                                       | +                                                         | +                                               | +                                                      | +                                                  | ?                                        |
| Zhang 2015 | +                                           | +                                       | +                                                         | +                                               | +                                                      | ?                                                  | +                                        |
| Zhang 2016 | ?                                           | ?                                       | +                                                         | +                                               | +                                                      | +                                                  | +                                        |
| Zhang 2017 | ?                                           | ?                                       | +                                                         | +                                               | +                                                      | +                                                  | ?                                        |
| Zhang 2022 | +                                           | +                                       | +                                                         | +                                               | +                                                      | +                                                  | +                                        |
| Zhao 2015  | ?                                           | ?                                       | +                                                         | +                                               | +                                                      | +                                                  | +                                        |
| Zhao 2016  | +                                           | ?                                       | +                                                         | +                                               | +                                                      | +                                                  | ?                                        |
| Zhao 2018  | ?                                           | ?                                       | +                                                         | +                                               | +                                                      | +                                                  | +                                        |
| Zhao 2019  | +                                           | +                                       | +                                                         | +                                               | +                                                      | ?                                                  | +                                        |
| Zhou 2015  | +                                           | ?                                       | +                                                         | +                                               | +                                                      | +                                                  | +                                        |
| Zhou 2016  | ?                                           | ?                                       | +                                                         | +                                               | +                                                      | +                                                  | ?                                        |
| Zhu 2013   | +                                           | +                                       | +                                                         | +                                               | ?                                                      | +                                                  | ?                                        |
| Zhu 2014   | +                                           | +                                       | +                                                         | +                                               | ?                                                      | ?                                                  | ?                                        |

Supplementary Figure 1. Risk of bias assessment summary

## A

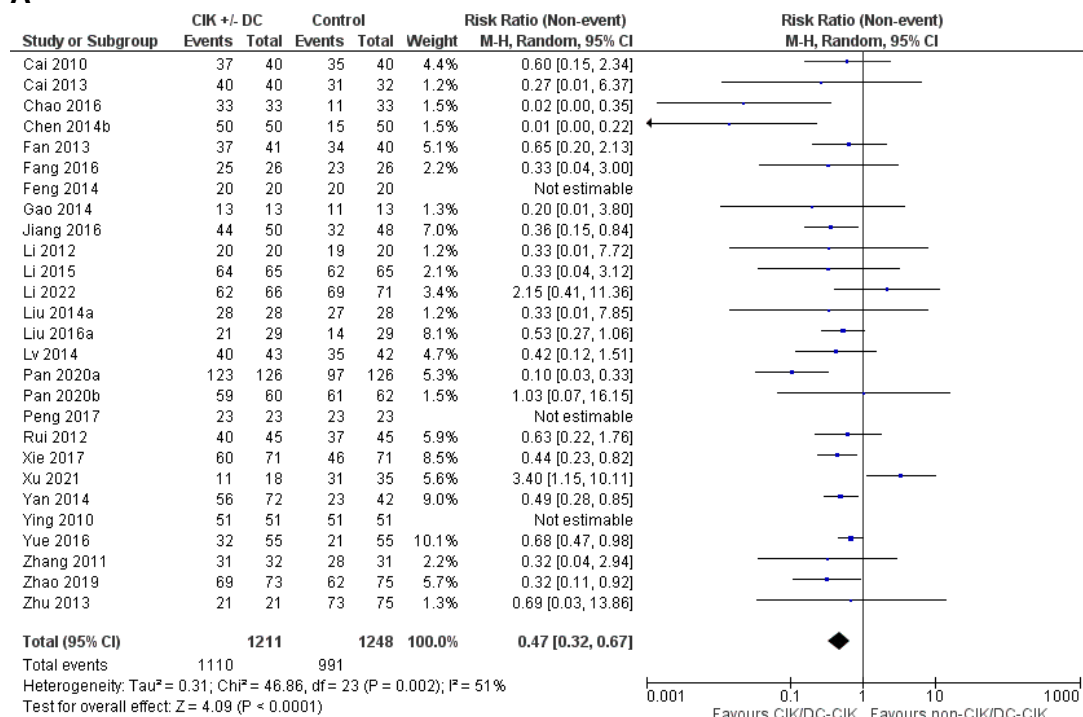

## B

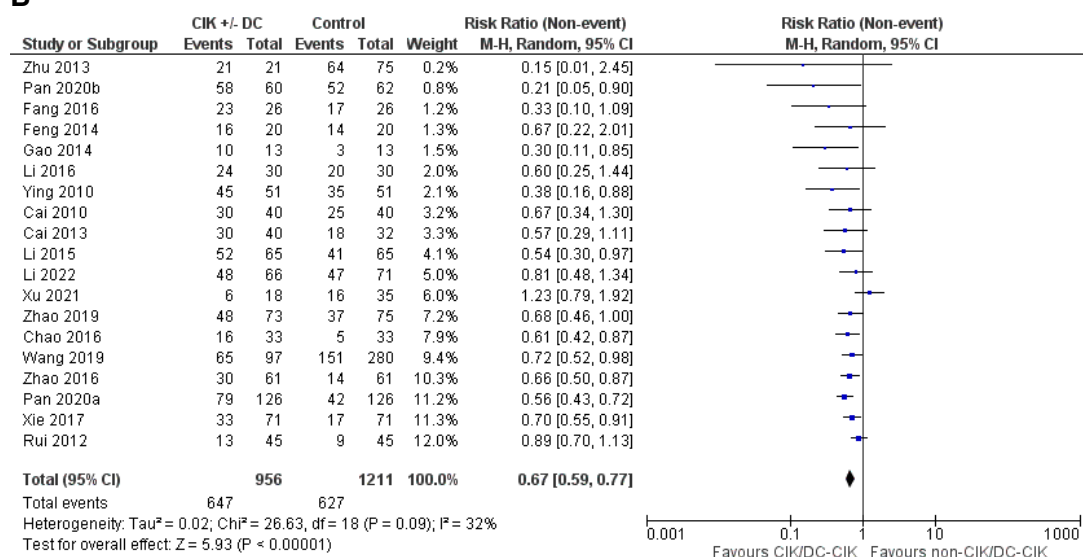

C

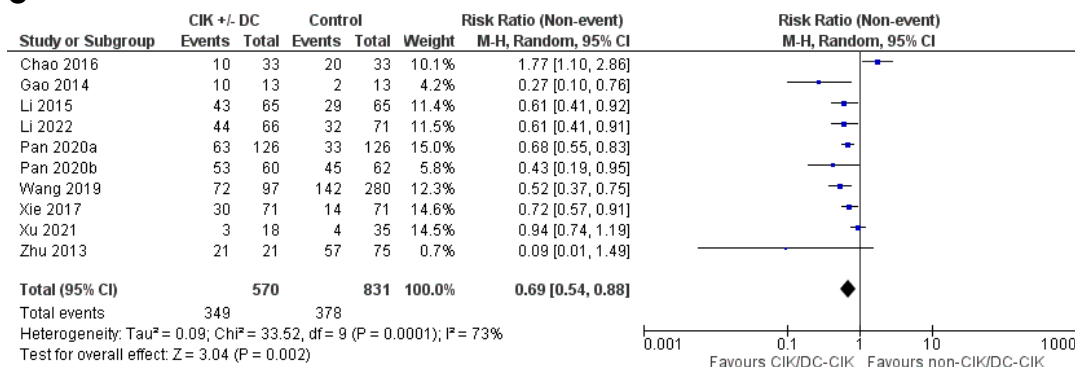

**Supplementary Figure 2.** CIK/DC-CIK therapy versus non-CIK/DC-CIK therapy for (A) 1-year, (B) 3-year and (C) 5-year overall survival (OS) rates. Twenty-seven studies involving 2,459 patients, nineteen studies involving 2,167 patients and ten studies involving 1,401 patients contributed data to 1-, 3- and 5-year OS rate analysis respectively. CIK, cytokine-induced killer cell; DC, dendritic cell.

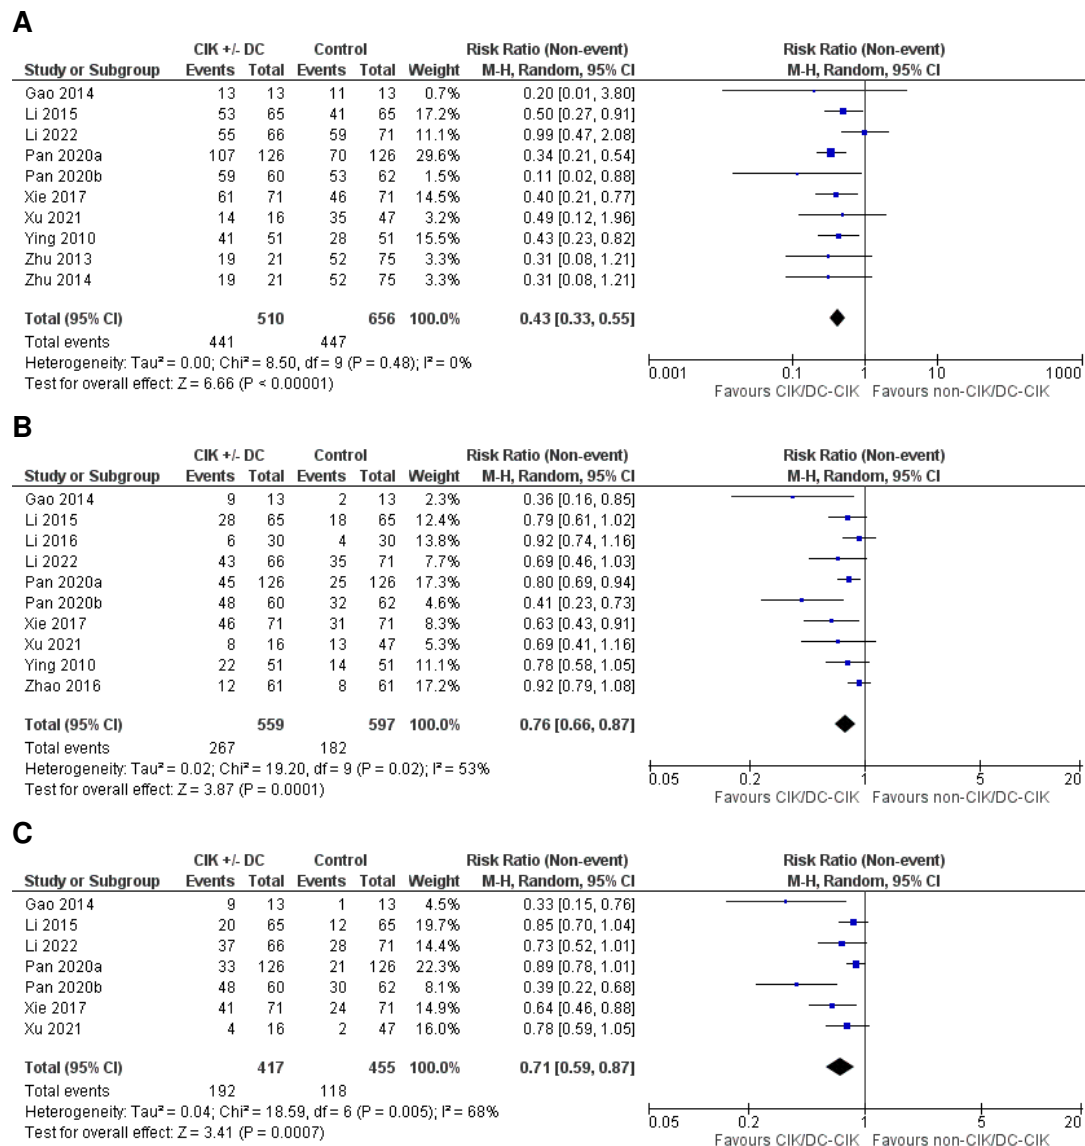

**Supplementary Figure 3.** CIK/DC-CIK therapy versus non-CIK/DC-CIK therapy for (A) 1-year, (B) 3-year and (C) 5-year progression-free survival (PFS) rates. Ten studies involving 1,166 patients, ten studies involving 1,156 patients and seven studies involving 872 patients contributed data to 1-, 3- and 5-year PFS rate analysis respectively. CIK, cytokine-induced killer cell; DC, dendritic cell.

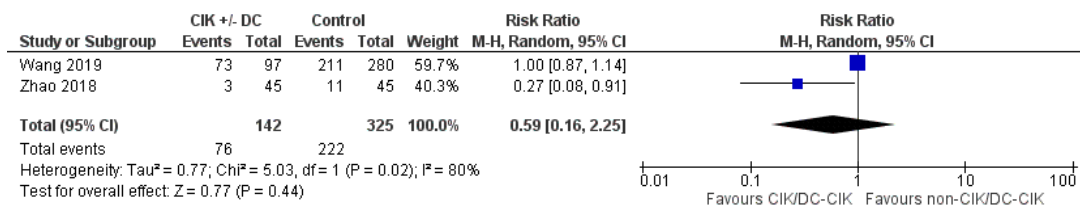

**Supplementary Figure 4.** CIK/DC-CIK therapy versus non-CIK/DC-CIK therapy on any adverse events. Two studies involving 467 patients contributed data to any adverse events analysis. CIK, cytokine-induced killer cell; DC, dendritic cell.

**A**

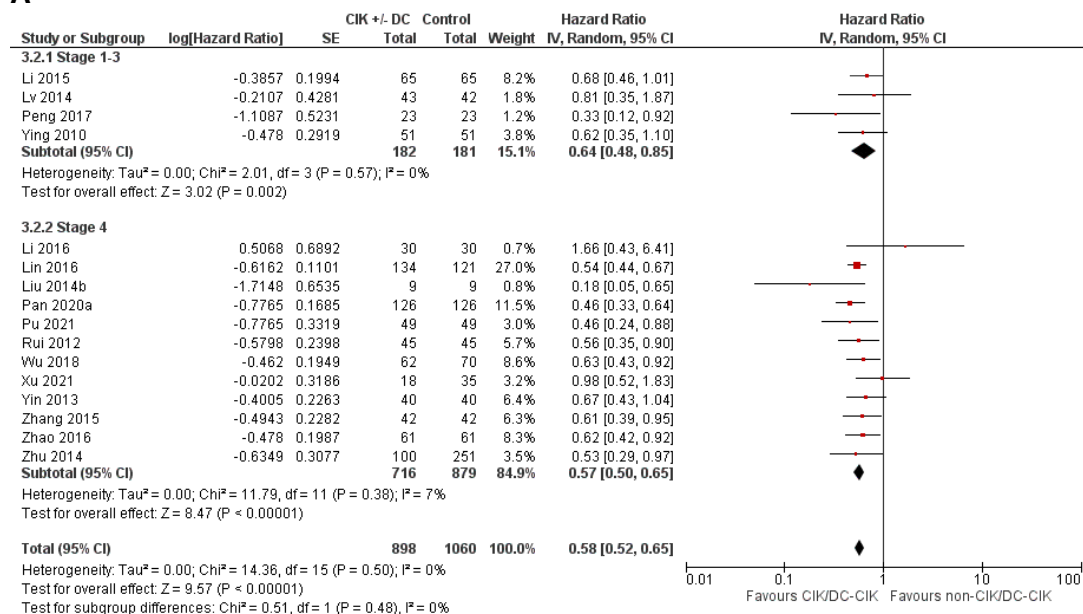

**B**

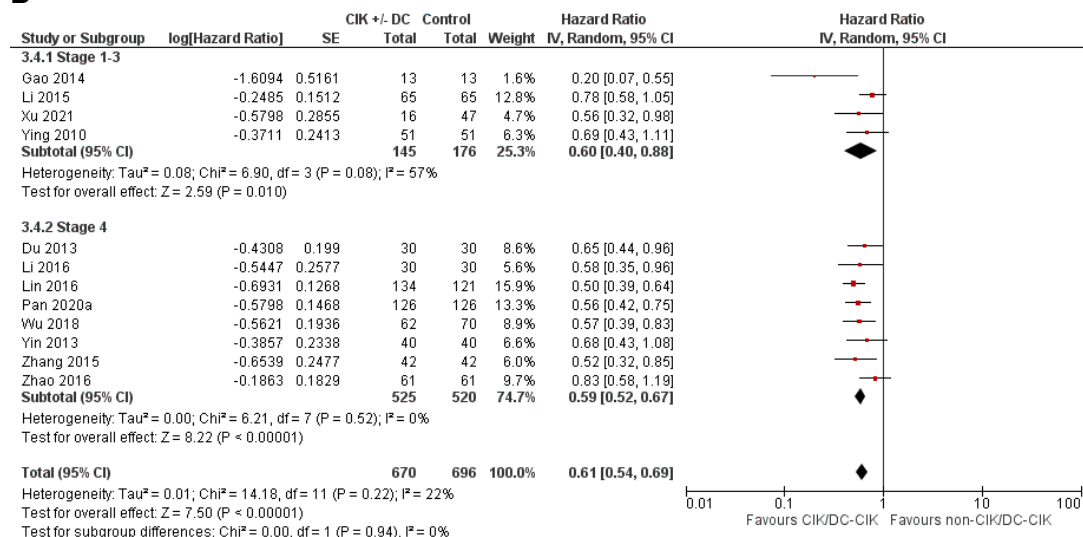

**Supplementary Figure 5.** Subgroup analysis by disease stage for (A) overall survival (OS) and (B) progression-free survival (PFS) between CIK/DC-CIK therapy versus non-CIK/DC-CIK therapy. Sixteen studies involving 1,958 patients and twelve studies involving 1,366 patients contributed data to OS and PFS analysis respectively. CIK, cytokine-induced killer cell; DC, dendritic cell.
